# Supplementary material for: Occurrence of Double Bond in π-Aromatic Rings: An Easy Way to Design Doubly Aromatic Carbon-Metal Structures
Source: MDPI journal article supplement (doi:10.3390/molecules26237232), 2021-11-29
Supplement: s1 [file s1]

# Occurrence of Double Bond in $\pi$ -Aromatic Rings: An Easy Way to Design Doubly Aromatic Carbon–Metal Structures

Nikolay V. Tkachenko <sup>1</sup>, Alvaro Muñoz-Castro <sup>2</sup> and Alexander I. Boldyrev <sup>1,\*</sup>

<sup>1</sup> Department of Chemistry and Biochemistry, Utah State University, 0300 Old Main Hill, Logan, UT 84322-0300, USA; nikolay.tkachenko95@gmail.com

<sup>2</sup> Grupo de Química Inorgánica y Materiales Moleculares, Facultad de Ingeniería, Universidad Autónoma de Chile, El Llano Subercaseaux, Santiago 2801, Chile; alvaro.munoz@uautonoma.cl

\* Correspondence: a.i.boldyrev@usu.edu

## Supporting Information

### Contents

|                                                                                   |     |
|-----------------------------------------------------------------------------------|-----|
| 1. Figure S1. Chemical bonding pattern of [Os]C <sub>5</sub> H <sub>5</sub> ..... | S2  |
| 2. Figure S2. Chemical bonding pattern of [Os]C <sub>5</sub> H <sub>4</sub> ..... | S3  |
| 3. Figure S3. Chemical bonding pattern of [Re]C <sub>5</sub> H <sub>4</sub> ..... | S4  |
| 4. Figure S4. Chemical bonding pattern of [Os] <sub>3</sub> C <sub>3</sub> .....  | S5  |
| 5. Figure S5. Chemical bonding pattern of [Re] <sub>3</sub> C <sub>3</sub> .....  | S5  |
| 6. Figure S6. The NICS <sub>zz</sub> -Scan plots .....                            | S6  |
| 7. Figure S7. The induced magnetic field for investigated complexes.....          | S7  |
| 8. Table S1. Optimized structures of investigated complexes.....                  | S8  |
| 9. Table S2. Coordinates of chosen points for NICS calculation. ....              | S11 |

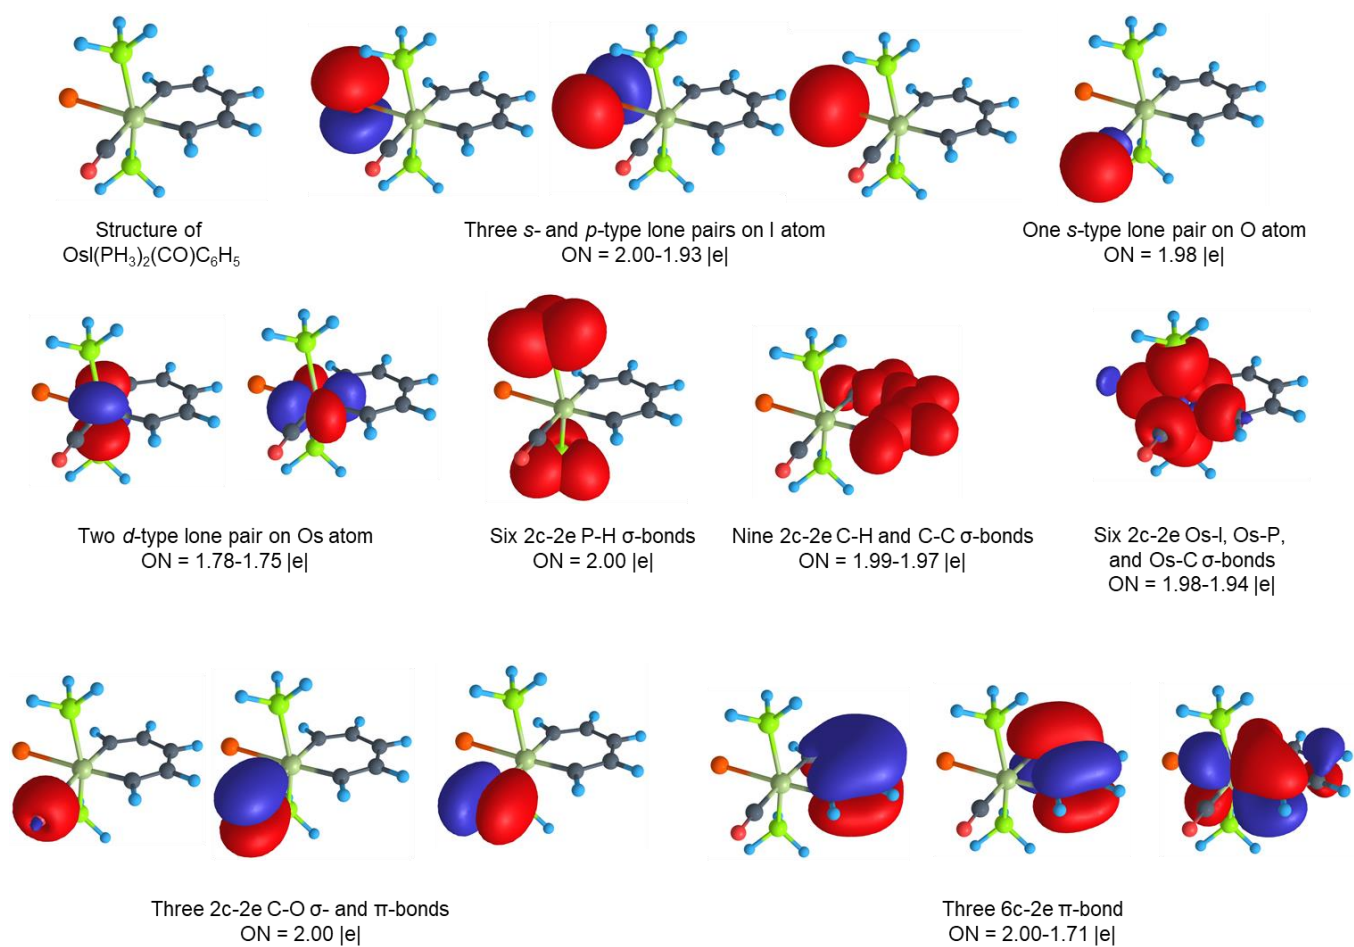

**Figure S1.** Chemical bonding pattern of  $[\text{Os}]\text{C}_5\text{H}_5$ .

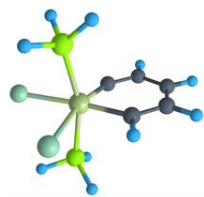

Structure of  
 $\text{OsCl}_2(\text{PH}_3)_2\text{C}_6\text{H}_4$

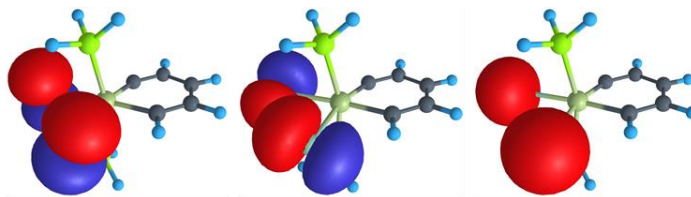

Six *s*- and *p*-type lone pairs on Cl atoms  
ON = 2.00-1.95 |e|

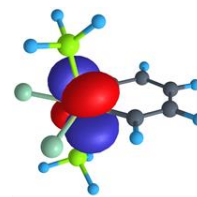

One *d*-type lone pair on Os atom  
ON = 1.87 |e|

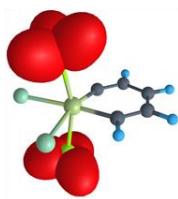

Six 2c-2e P-H  $\sigma$ -bonds  
ON = 2.00 |e|

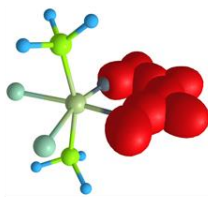

Eight 2c-2e C-H and C-C  $\sigma$ -bonds  
ON = 1.99-1.97 |e|

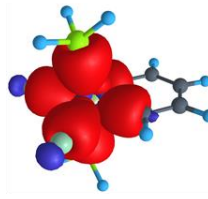

Six 2c-2e Os-Cl, Os-P,  
and Os-C  $\sigma$ -bonds  
ON = 1.99-1.97 |e|

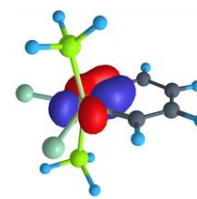

One 2c-2e Os-C  $\pi$ -bond  
ON = 1.96 |e|

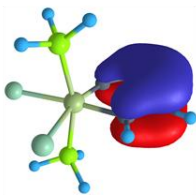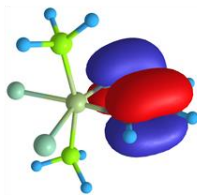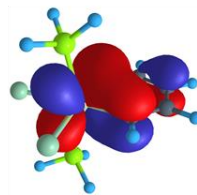

Three 6c-2e  $\pi$ -bond  
ON = 2.00-1.74 |e|

**Figure S2.** Chemical bonding pattern of  $[\text{Os}]\text{C}_5\text{H}_4$ .

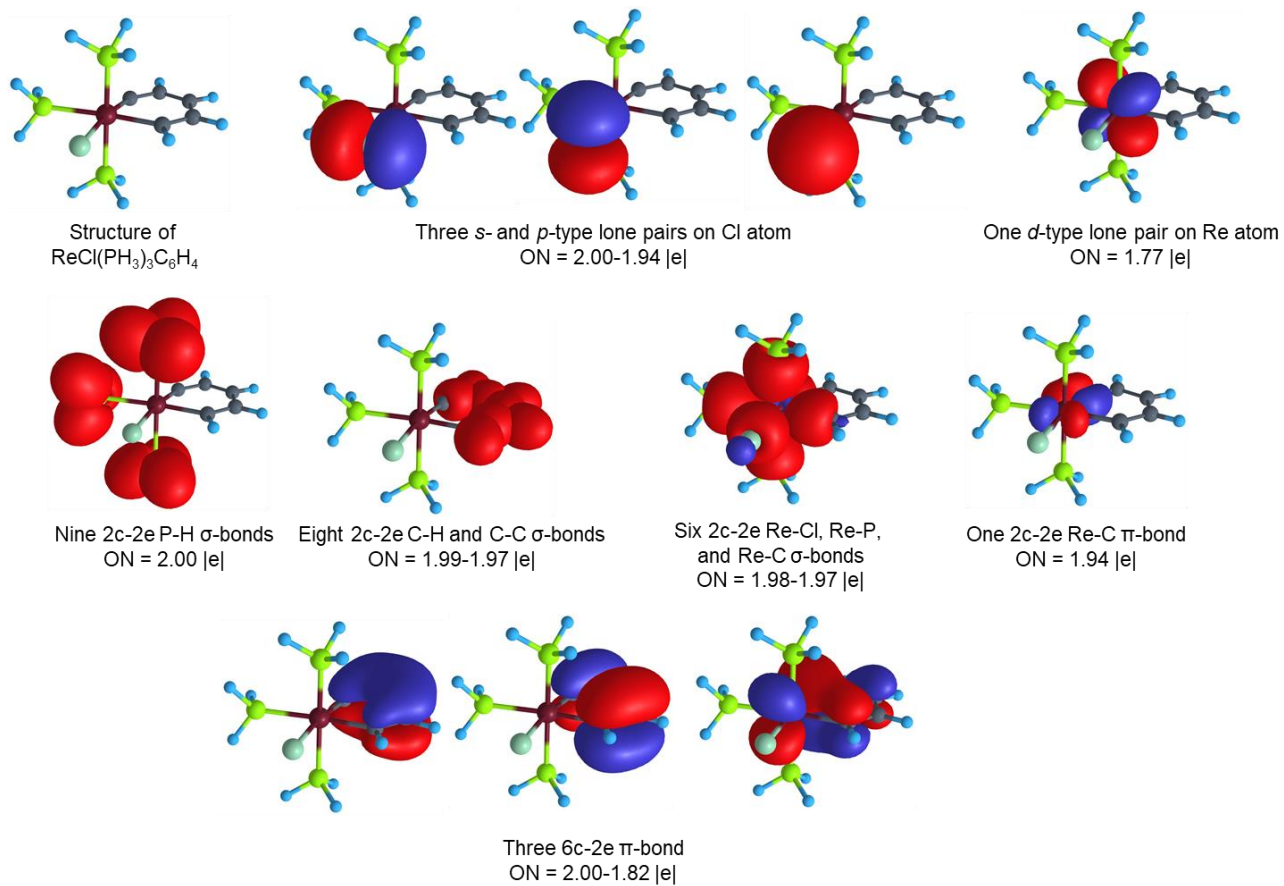

**Figure S3.** Chemical bonding pattern of  $[\text{Re}]\text{C}_5\text{H}_4$ .

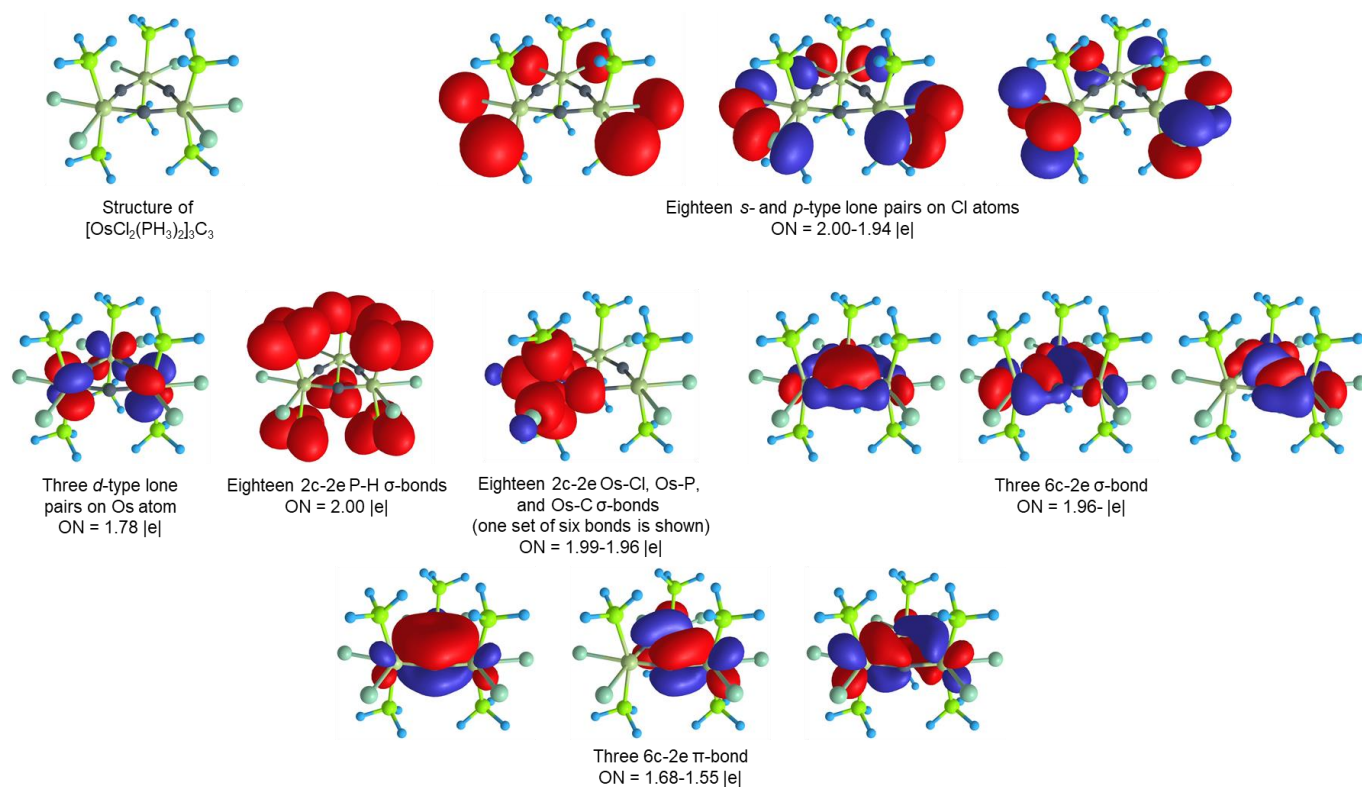

**Figure S4.** Chemical bonding pattern of  $[\text{Os}]_3\text{C}_3$ .

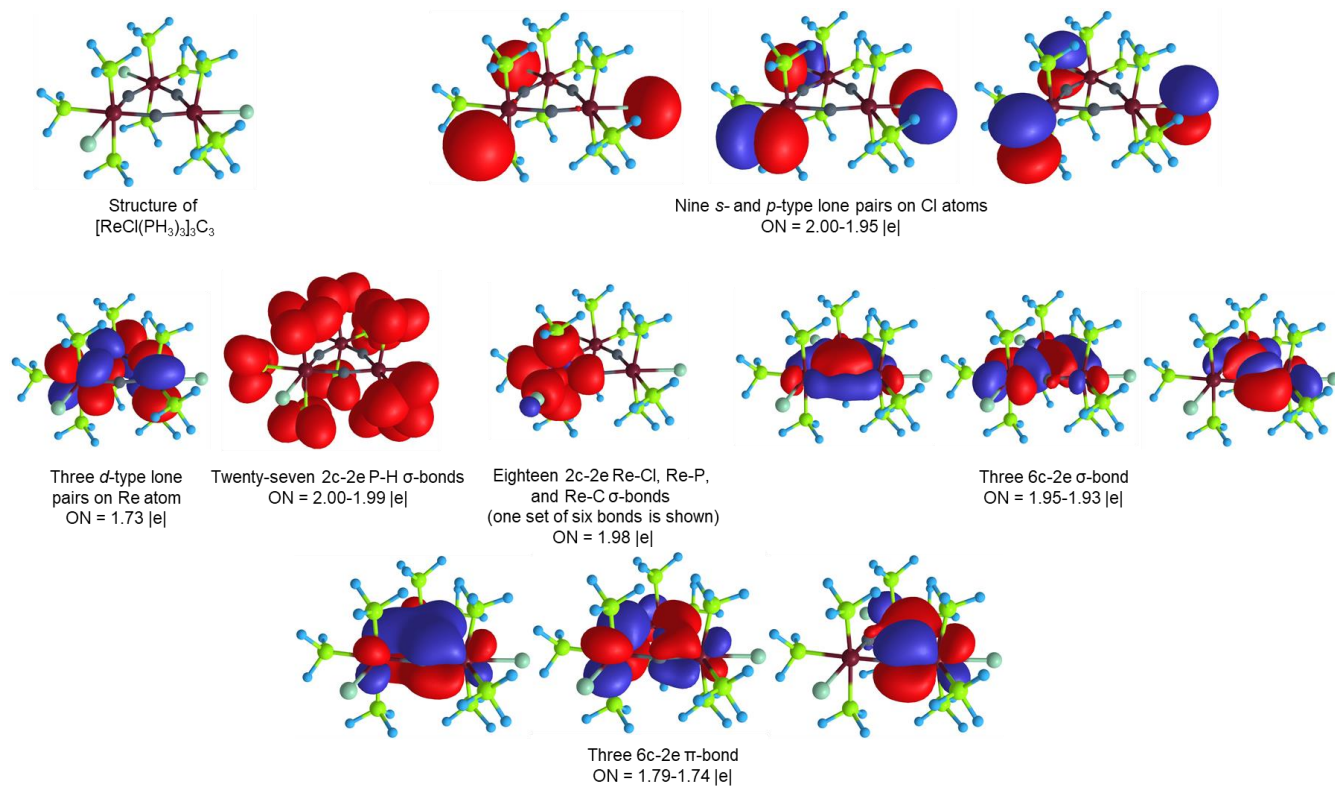

**Figure S5.** Chemical bonding pattern of  $[\text{Re}]_3\text{C}_3$ .

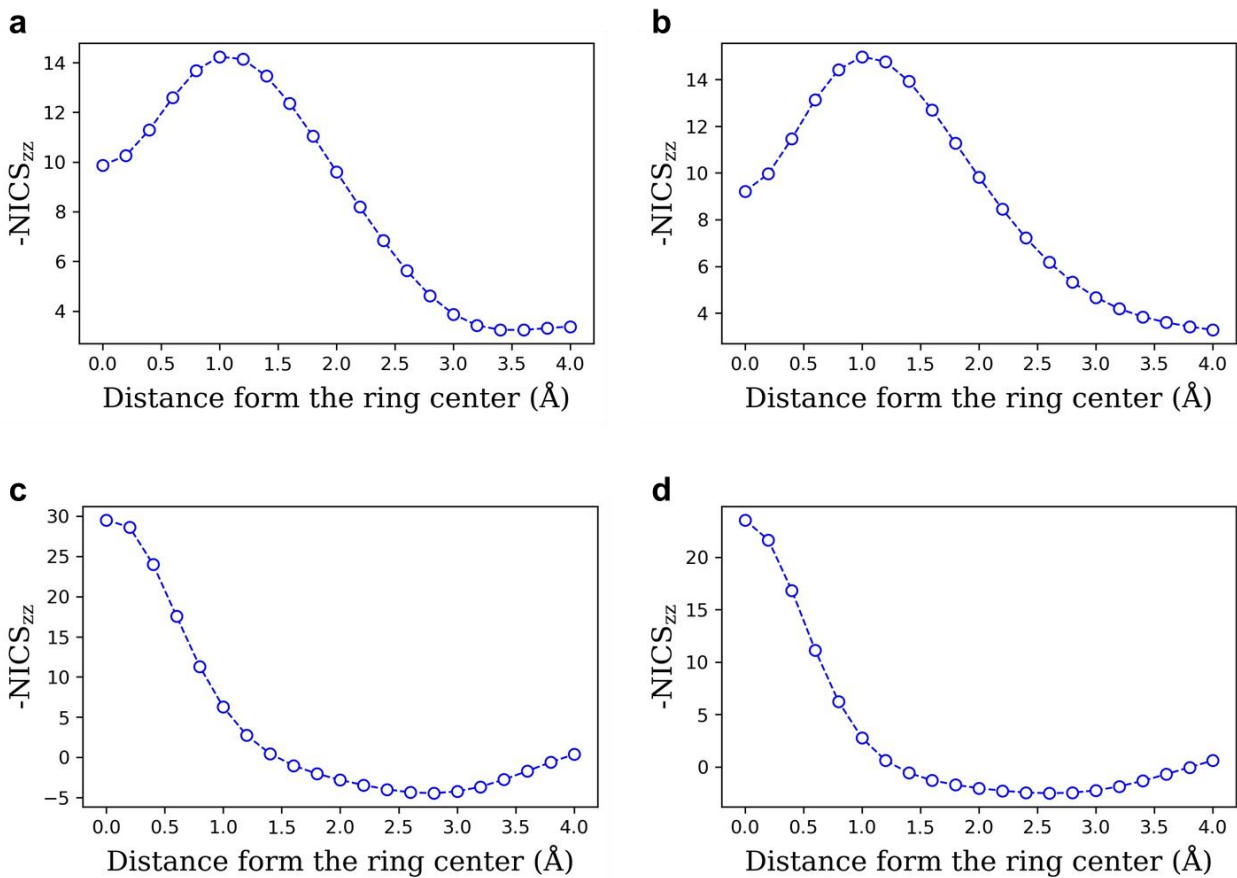

**Figure S6.** The  $NICS_{zz}$  values calculated at different distances from the ring center:  $[\text{Re}]C_5H_4$  (a),  $[\text{Os}]C_5H_4$  (b),  $[\text{Re}]C_3$  (c),  $[\text{Os}]C_3$  (d).



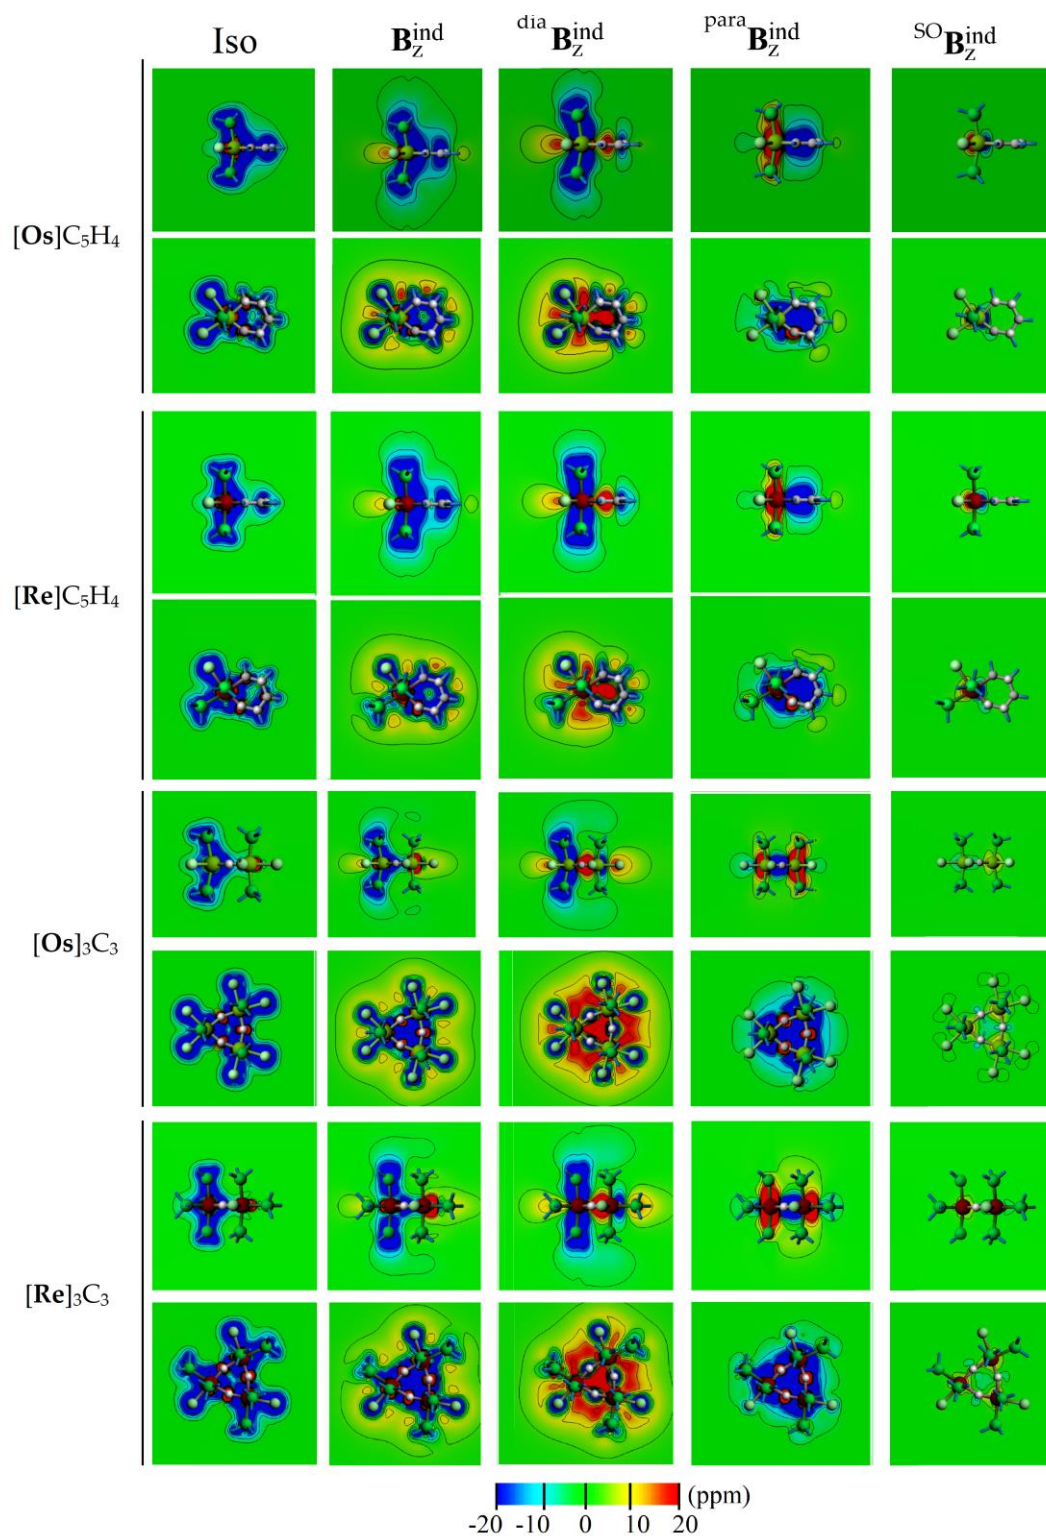

**Figure S7.** The induced magnetic field for investigated complexes, given as contour plot and its contribution from diamagnetic ( $^{\text{dia}}B_Z^{\text{ind}}$ ), paramagnetic ( $^{\text{para}}B_Z^{\text{ind}}$ ), and spin-orbit ( $^{\text{SO}}B_Z^{\text{ind}}$ ) terms.

**Table S1.** Optimized structures of investigated complexes.

| [Os]C <sub>5</sub> H <sub>5</sub> | PBE0/def2tzvp, 0 Imaginary Frequencies |              |              |              |
|-----------------------------------|----------------------------------------|--------------|--------------|--------------|
|                                   | 76                                     | -0.016377000 | 0.510429000  | 0.000000000  |
|                                   | 6                                      | 1.978674000  | -0.093854000 | 0.000000000  |
|                                   | 6                                      | 0.653674000  | 2.366970000  | 0.000000000  |
|                                   | 1                                      | -0.074399000 | 3.184241000  | 0.000000000  |
|                                   | 6                                      | 3.116042000  | 0.664446000  | 0.000000000  |
|                                   | 6                                      | 1.963773000  | 2.856527000  | 0.000000000  |
|                                   | 1                                      | 4.093176000  | 0.185347000  | 0.000000000  |
|                                   | 1                                      | 2.107521000  | 3.934684000  | 0.000000000  |
|                                   | 6                                      | 3.098304000  | 2.072589000  | 0.000000000  |
|                                   | 1                                      | 4.058259000  | 2.584156000  | 0.000000000  |
|                                   | 53                                     | -0.786554000 | -2.224369000 | 0.000000000  |
|                                   | 15                                     | -0.016377000 | 0.098443000  | 2.293886000  |
|                                   | 15                                     | -0.016377000 | 0.098443000  | -2.293886000 |
|                                   | 1                                      | 0.833143000  | -0.931161000 | -2.733990000 |
|                                   | 1                                      | -1.224690000 | -0.297518000 | -2.895292000 |
|                                   | 1                                      | 0.370275000  | 1.117437000  | -3.194957000 |
|                                   | 1                                      | 0.833143000  | -0.931161000 | 2.733990000  |
|                                   | 1                                      | -1.224690000 | -0.297518000 | 2.895292000  |
|                                   | 1                                      | 0.370275000  | 1.117437000  | 3.194957000  |
|                                   | 1                                      | 2.168296000  | -1.172740000 | 0.000000000  |
|                                   | 6                                      | -1.815920000 | 1.187062000  | 0.000000000  |
|                                   | 8                                      | -2.856776000 | 1.666256000  | 0.000000000  |
| [Os]C <sub>5</sub> H <sub>4</sub> | PBE0/def2tzvp, 0 imaginary frequencies |              |              |              |
|                                   | 76                                     | 0.057262000  | -0.018753000 | -0.087455000 |
|                                   | 6                                      | -1.345279000 | -0.272567000 | -1.124134000 |
|                                   | 6                                      | -1.429875000 | 0.250012000  | 1.266407000  |
|                                   | 1                                      | -1.094521000 | 0.475854000  | 2.278966000  |
|                                   | 6                                      | -2.700536000 | -0.330860000 | -1.309748000 |
|                                   | 6                                      | -2.795036000 | 0.186883000  | 1.092826000  |
|                                   | 1                                      | -3.175186000 | -0.540349000 | -2.259646000 |
|                                   | 1                                      | -3.447335000 | 0.358006000  | 1.944353000  |
|                                   | 6                                      | -3.410720000 | -0.090924000 | -0.141615000 |
|                                   | 1                                      | -4.496263000 | -0.118858000 | -0.186055000 |
|                                   | 17                                     | 2.097236000  | -0.354440000 | -1.395549000 |
|                                   | 17                                     | 1.507082000  | 0.517560000  | 1.835950000  |
|                                   | 15                                     | 0.381145000  | 2.278237000  | -0.438918000 |
|                                   | 15                                     | 0.497784000  | -2.279395000 | 0.360778000  |
|                                   | 1                                      | 0.607676000  | -3.134701000 | -0.749295000 |
|                                   | 1                                      | 1.729813000  | -2.479110000 | 1.001468000  |
|                                   | 1                                      | -0.361658000 | -3.038300000 | 1.183799000  |
|                                   | 1                                      | -0.263203000 | 2.929735000  | -1.511558000 |
|                                   | 1                                      | 1.721405000  | 2.611664000  | -0.688507000 |
|                                   | 1                                      | 0.058692000  | 3.150372000  | 0.615917000  |



| [Re]C <sub>5</sub> H <sub>4</sub> | PBE0/def2tzvp, 0 imaginary frequencies |              |              |              |
|-----------------------------------|----------------------------------------|--------------|--------------|--------------|
|                                   | 75                                     | -0.083604000 | -0.000001000 |              |
|                                   |                                        | -0.121317000 |              |              |
|                                   | 6                                      | 1.311462000  | -0.000040000 | -1.225144000 |
|                                   | 6                                      | 1.474551000  | -0.000068000 | 1.281708000  |
|                                   | 1                                      | 1.194326000  | -0.000004000 | 2.339765000  |
|                                   | 6                                      | 2.687335000  | -0.000068000 | -1.423624000 |
|                                   | 6                                      | 2.824570000  | -0.000064000 | 1.044917000  |
|                                   | 1                                      | 3.163564000  | -0.000076000 | -2.397324000 |
|                                   | 1                                      | 3.517918000  | -0.000056000 | 1.883419000  |
|                                   | 6                                      | 3.410784000  | -0.000054000 | -0.253136000 |
|                                   | 1                                      | 4.495927000  | -0.000058000 | -0.320386000 |
|                                   | 17                                     | -1.708853000 | 0.000042000  | 1.811478000  |
|                                   | 15                                     | -0.209051000 | -2.348941000 | 0.219419000  |
|                                   | 15                                     | -0.208857000 | 2.348945000  | 0.219431000  |
|                                   | 1                                      | -1.398180000 | 3.063042000  | -0.057110000 |
|                                   | 1                                      | -0.009341000 | 2.795688000  | 1.541614000  |
|                                   | 1                                      | 0.698718000  | 3.204069000  | -0.441353000 |
|                                   | 1                                      | 0.698394000  | -3.204154000 | -0.441430000 |
|                                   | 1                                      | -1.398466000 | -3.062909000 | -0.057053000 |
|                                   | 1                                      | -0.009495000 | -2.795717000 | 1.541585000  |
|                                   | 1                                      | -3.044141000 | 1.053907000  | -1.412807000 |
|                                   | 1                                      | -1.970206000 | 0.000043000  | -2.916906000 |
|                                   | 1                                      | -3.044241000 | -1.053680000 | -1.412778000 |
|                                   | 15                                     | -2.103837000 | 0.000067000  | -1.511778000 |
| [Os] <sub>3</sub> C <sub>3</sub>  | PBE0/def2tzvp, 0 imaginary frequencies |              |              |              |
|                                   | 76                                     | 0.000000000  | 2.103220000  | -0.000108000 |
|                                   | 6                                      | 1.183242000  | 0.683137000  | -0.000277000 |
|                                   | 6                                      | -1.183235000 | 0.683149000  | -0.000277000 |
|                                   | 6                                      | -0.000007000 | -1.366286000 | -0.000277000 |
|                                   | 17                                     | 1.710170000  | 3.877612000  | 0.096341000  |
|                                   | 17                                     | -1.710185000 | 3.877631000  | -0.095748000 |
|                                   | 15                                     | -0.148940000 | 2.563993000  | -2.306385000 |
|                                   | 15                                     | 0.149220000  | 2.562665000  | 2.306355000  |
|                                   | 1                                      | 1.428475000  | 2.503150000  | 2.883775000  |
|                                   | 1                                      | -0.255791000 | 3.870791000  | 2.607823000  |
|                                   | 1                                      | -0.593270000 | 1.832276000  | 3.262586000  |
|                                   | 1                                      | 0.594889000  | 1.835124000  | -3.262706000 |
|                                   | 1                                      | 0.254883000  | 3.872752000  | -2.606656000 |
|                                   | 1                                      | -1.427798000 | 2.503637000  | -2.884612000 |
|                                   | 76                                     | 1.821442000  | -1.051610000 | -0.000108000 |
|                                   | 1                                      | 1.291820000  | -1.432751000 | -3.262706000 |
|                                   | 1                                      | 3.226460000  | -2.157111000 | -2.606656000 |
|                                   | 1                                      | 2.882112000  | -0.015309000 | -2.884612000 |
|                                   | 1                                      | 1.453554000  | -2.488671000 | 2.883775000  |
|                                   | 1                                      | 3.480099000  | -1.713874000 | 2.607823000  |

|                                      |                                               |              |              |              |
|--------------------------------------|-----------------------------------------------|--------------|--------------|--------------|
|                                      | 1                                             | 1.883433000  | -0.402351000 | 3.262586000  |
|                                      | 15                                            | 2.144723000  | -1.410561000 | 2.306355000  |
|                                      | 17                                            | 4.213219000  | -0.457752000 | -0.095748000 |
|                                      | 17                                            | 2.503025000  | -3.419856000 | 0.096341000  |
|                                      | 15                                            | 2.294953000  | -1.153010000 | -2.306385000 |
|                                      | 76                                            | -1.821442000 | -1.051610000 |              |
|                                      |                                               | -0.000108000 |              |              |
|                                      | 1                                             | -1.886709000 | -0.402373000 | -3.262706000 |
|                                      | 1                                             | -3.481343000 | -1.715641000 | -2.606656000 |
|                                      | 1                                             | -1.454314000 | -2.488328000 | -2.884612000 |
|                                      | 1                                             | -2.882029000 | -0.014479000 | 2.883775000  |
|                                      | 1                                             | -3.224307000 | -2.156917000 | 2.607823000  |
|                                      | 1                                             | -1.290162000 | -1.429925000 | 3.262586000  |
|                                      | 15                                            | -2.293943000 | -1.152104000 | 2.306355000  |
|                                      | 17                                            | -2.503034000 | -3.419879000 |              |
|                                      |                                               | -0.095748000 |              |              |
|                                      | 17                                            | -4.213195000 | -0.457755000 | 0.096341000  |
|                                      | 15                                            | -2.146013000 | -1.410983000 |              |
|                                      |                                               | -2.306385000 |              |              |
| <b>[Re]<sub>3</sub>C<sub>3</sub></b> | <b>PBE0/def2tzvp, 0 imaginary frequencies</b> |              |              |              |
|                                      | 75                                            | 0.488616000  | -2.112701000 | 0.027325000  |
|                                      | 6                                             | -0.970561000 | -1.014492000 | 0.046660000  |
|                                      | 6                                             | 1.363927000  | -0.333281000 | 0.046650000  |
|                                      | 6                                             | -0.393283000 | 1.347878000  | 0.046299000  |
|                                      | 17                                            | 2.512902000  | -3.678693000 | -0.161736000 |
|                                      | 15                                            | 0.859504000  | -2.263191000 | -2.323218000 |
|                                      | 15                                            | 0.785945000  | -2.275262000 | 2.371450000  |
|                                      | 1                                             | -0.177257000 | -2.840369000 | 3.243127000  |
|                                      | 1                                             | 1.892743000  | -3.055001000 | 2.773192000  |
|                                      | 1                                             | 1.056312000  | -1.123606000 | 3.146294000  |
|                                      | 1                                             | 0.084050000  | -1.555896000 | -3.273557000 |
|                                      | 1                                             | 0.796501000  | -3.531743000 | -2.940866000 |
|                                      | 1                                             | 2.134856000  | -1.880390000 | -2.784573000 |
|                                      | 1                                             | -0.591603000 | -5.205598000 | 1.004299000  |
|                                      | 1                                             | -2.169290000 | -4.232527000 | -0.032315000 |
|                                      | 1                                             | -0.565268000 | -5.140735000 | -1.101074000 |
|                                      | 15                                            | -0.757515000 | -4.245088000 |              |
|                                      |                                               | -0.021914000 |              |              |
|                                      | 75                                            | 1.585427000  | 1.479532000  | 0.027194000  |
|                                      | 17                                            | 1.929900000  | 4.015593000  | -0.162669000 |
|                                      | 15                                            | 1.531263000  | 1.875468000  | -2.323473000 |
|                                      | 15                                            | 1.576136000  | 1.818733000  | 2.371193000  |
|                                      | 15                                            | 4.055261000  | 1.466443000  | -0.020538000 |
|                                      | 1                                             | 1.307782000  | 0.849853000  | -3.273730000 |
|                                      | 1                                             | 2.661280000  | 2.455976000  | -2.940459000 |
|                                      | 1                                             | 0.561537000  | 2.787591000  | -2.785622000 |

|  |    |              |              |              |
|--|----|--------------|--------------|--------------|
|  | 1  | 2.546867000  | 1.267869000  | 3.243642000  |
|  | 1  | 1.696966000  | 3.167224000  | 2.772870000  |
|  | 1  | 0.443247000  | 1.476449000  | 3.145252000  |
|  | 1  | 4.803575000  | 2.092104000  | 1.005017000  |
|  | 1  | 4.750136000  | 0.237450000  | -0.028387000 |
|  | 1  | 4.735552000  | 2.078756000  | -1.100365000 |
|  | 75 | -2.073936000 | 0.633253000  | 0.027166000  |
|  | 17 | -4.442560000 | -0.336476000 | -0.161612000 |
|  | 15 | -2.390017000 | 0.386736000  | -2.323310000 |
|  | 15 | -2.363042000 | 0.457194000  | 2.371266000  |
|  | 15 | -3.298160000 | 2.778285000  | -0.022026000 |
|  | 1  | -1.389801000 | 0.704475000  | -3.273791000 |
|  | 1  | -3.457233000 | 1.075253000  | -2.941088000 |
|  | 1  | -2.696057000 | -0.909320000 | -2.784241000 |
|  | 1  | -2.371463000 | 1.574023000  | 3.242804000  |
|  | 1  | -3.591336000 | -0.112102000 | 2.773248000  |
|  | 1  | -1.500330000 | -0.352189000 | 3.146152000  |
|  | 1  | -2.581884000 | 3.994936000  | -0.032592000 |
|  | 1  | -4.170356000 | 3.059218000  | -1.100937000 |
|  | 1  | -4.212763000 | 3.114396000  | 1.004492000  |

**Table S2.** Coordinates of chosen points for NICS calculation.

|                                   |         |              |              |              |
|-----------------------------------|---------|--------------|--------------|--------------|
| [Os]C <sub>5</sub> H <sub>4</sub> | 76      | 0.054040000  | -0.099087000 | -0.119586000 |
|                                   | 6       | -1.363000000 | -0.049669000 | -1.166392000 |
|                                   | 6       | -1.413437000 | -0.076443000 | 1.281397000  |
|                                   | 1       | -1.063813000 | -0.099986000 | 2.313846000  |
|                                   | 6       | -2.720237000 | -0.004018000 | -1.340739000 |
|                                   | 6       | -2.780744000 | -0.037769000 | 1.117828000  |
|                                   | 1       | -3.207986000 | 0.027529000  | -2.306446000 |
|                                   | 1       | -3.420892000 | -0.034143000 | 1.995366000  |
|                                   | 6       | -3.413713000 | -0.002240000 | -0.138427000 |
|                                   | 1       | -4.499544000 | 0.029074000  | -0.172306000 |
|                                   | 17      | 2.070798000  | -0.221871000 | -1.499042000 |
|                                   | 17      | 1.535089000  | -0.075665000 | 1.854000000  |
|                                   | 15      | 0.483578000  | 2.201174000  | 0.050372000  |
|                                   | 15      | 0.390153000  | -2.419934000 | -0.198145000 |
|                                   | 1       | 0.455453000  | -3.006885000 | -1.473728000 |
|                                   | 1       | 1.614063000  | -2.813811000 | 0.363255000  |
|                                   | 1       | -0.500521000 | -3.305744000 | 0.445270000  |
|                                   | 1       | -0.133909000 | 3.105904000  | -0.838651000 |
|                                   | 1       | 1.836950000  | 2.522106000  | -0.137119000 |
|                                   | 1       | 0.206517000  | 2.826453000  | 1.279004000  |
|                                   | Point 1 | -1.937000000 | 0.000000000  | -0.051000000 |
|                                   | Point 2 | -1.937000000 | 1.000000000  | -0.051000000 |

|                                       |         |              |              |              |
|---------------------------------------|---------|--------------|--------------|--------------|
| <b>[Re]C<sub>5</sub>H<sub>4</sub></b> | 75      | -0.083604000 | -0.000001000 | -0.121317000 |
|                                       | 6       | 1.311462000  | -0.000040000 | -1.225144000 |
|                                       | 6       | 1.474551000  | -0.000068000 | 1.281708000  |
|                                       | 1       | 1.194326000  | -0.000004000 | 2.339765000  |
|                                       | 6       | 2.687335000  | -0.000068000 | -1.423624000 |
|                                       | 6       | 2.824570000  | -0.000064000 | 1.044917000  |
|                                       | 1       | 3.163564000  | -0.000076000 | -2.397324000 |
|                                       | 1       | 3.517918000  | -0.000056000 | 1.883419000  |
|                                       | 6       | 3.410784000  | -0.000054000 | -0.253136000 |
|                                       | 1       | 4.495927000  | -0.000058000 | -0.320386000 |
|                                       | 17      | -1.708853000 | 0.000042000  | 1.811478000  |
|                                       | 15      | -0.209051000 | -2.348941000 | 0.219419000  |
|                                       | 15      | -0.208857000 | 2.348945000  | 0.219431000  |
|                                       | 1       | -1.398180000 | 3.063042000  | -0.057110000 |
|                                       | 1       | -0.009341000 | 2.795688000  | 1.541614000  |
|                                       | 1       | 0.698718000  | 3.204069000  | -0.441353000 |
|                                       | 1       | 0.698394000  | -3.204154000 | -0.441430000 |
|                                       | 1       | -1.398466000 | -3.062909000 | -0.057053000 |
|                                       | 1       | -0.009495000 | -2.795717000 | 1.541585000  |
|                                       | 1       | -3.044141000 | 1.053907000  | -1.412807000 |
|                                       | 1       | -1.970206000 | 0.000043000  | -2.916906000 |
|                                       | 1       | -3.044241000 | -1.053680000 | -1.412778000 |
|                                       | 15      | -2.103837000 | 0.000067000  | -1.511778000 |
|                                       | Point 1 | 1.937516000  | -0.000049000 | -0.116099000 |
|                                       | Point 2 | 1.938000000  | 1.000000000  | -0.116000000 |
| <b>[Os]<sub>3</sub>C<sub>3</sub></b>  | 76      | 0.000000000  | 2.103220000  | -0.000108000 |
|                                       | 6       | 1.183242000  | 0.683137000  | -0.000277000 |
|                                       | 6       | -1.183235000 | 0.683149000  | -0.000277000 |
|                                       | 6       | -0.000007000 | -1.366286000 | -0.000277000 |
|                                       | 17      | 1.710170000  | 3.877612000  | 0.096341000  |
|                                       | 17      | -1.710185000 | 3.877631000  | -0.095748000 |
|                                       | 15      | -0.148940000 | 2.563993000  | -2.306385000 |
|                                       | 15      | 0.149220000  | 2.562665000  | 2.306355000  |
|                                       | 1       | 1.428475000  | 2.503150000  | 2.883775000  |
|                                       | 1       | -0.255791000 | 3.870791000  | 2.607823000  |
|                                       | 1       | -0.593270000 | 1.832276000  | 3.262586000  |
|                                       | 1       | 0.594889000  | 1.835124000  | -3.262706000 |
|                                       | 1       | 0.254883000  | 3.872752000  | -2.606656000 |
|                                       | 1       | -1.427798000 | 2.503637000  | -2.884612000 |
|                                       | 76      | 1.821442000  | -1.051610000 | -0.000108000 |
|                                       | 1       | 1.291820000  | -1.432751000 | -3.262706000 |
|                                       | 1       | 3.226460000  | -2.157111000 | -2.606656000 |
|                                       | 1       | 2.882112000  | -0.015309000 | -2.884612000 |
|                                       | 1       | 1.453554000  | -2.488671000 | 2.883775000  |
|                                       | 1       | 3.480099000  | -1.713874000 | 2.607823000  |
|                                       | 1       | 1.883433000  | -0.402351000 | 3.262586000  |

|                                  |         |              |              |              |
|----------------------------------|---------|--------------|--------------|--------------|
|                                  | 15      | 2.144723000  | -1.410561000 | 2.306355000  |
|                                  | 17      | 4.213219000  | -0.457752000 | -0.095748000 |
|                                  | 17      | 2.503025000  | -3.419856000 | 0.096341000  |
|                                  | 15      | 2.294953000  | -1.153010000 | -2.306385000 |
|                                  | 76      | -1.821442000 | -1.051610000 | -0.000108000 |
|                                  | 1       | -1.886709000 | -0.402373000 | -3.262706000 |
|                                  | 1       | -3.481343000 | -1.715641000 | -2.606656000 |
|                                  | 1       | -1.454314000 | -2.488328000 | -2.884612000 |
|                                  | 1       | -2.882029000 | -0.014479000 | 2.883775000  |
|                                  | 1       | -3.224307000 | -2.156917000 | 2.607823000  |
|                                  | 1       | -1.290162000 | -1.429925000 | 3.262586000  |
|                                  | 15      | -2.293943000 | -1.152104000 | 2.306355000  |
|                                  | 17      | -2.503034000 | -3.419879000 | -0.095748000 |
|                                  | 17      | -4.213195000 | -0.457755000 | 0.096341000  |
|                                  | 15      | -2.146013000 | -1.410983000 | -2.306385000 |
|                                  | Point 1 | 0.000000000  | 0.000000000  | -0.000193000 |
|                                  | Point 2 | 0.000000000  | 0.000000000  | 1.000000000  |
| [Re] <sub>3</sub> C <sub>3</sub> | 75      | 0.488616000  | -2.112701000 | 0.027325000  |
|                                  | 6       | -0.970561000 | -1.014492000 | 0.046660000  |
|                                  | 6       | 1.363927000  | -0.333281000 | 0.046650000  |
|                                  | 6       | -0.393283000 | 1.347878000  | 0.046299000  |
|                                  | 17      | 2.512902000  | -3.678693000 | -0.161736000 |
|                                  | 15      | 0.859504000  | -2.263191000 | -2.323218000 |
|                                  | 15      | 0.785945000  | -2.275262000 | 2.371450000  |
|                                  | 1       | -0.177257000 | -2.840369000 | 3.243127000  |
|                                  | 1       | 1.892743000  | -3.055001000 | 2.773192000  |
|                                  | 1       | 1.056312000  | -1.123606000 | 3.146294000  |
|                                  | 1       | 0.084050000  | -1.555896000 | -3.273557000 |
|                                  | 1       | 0.796501000  | -3.531743000 | -2.940866000 |
|                                  | 1       | 2.134856000  | -1.880390000 | -2.784573000 |
|                                  | 1       | -0.591603000 | -5.205598000 | 1.004299000  |
|                                  | 1       | -2.169290000 | -4.232527000 | -0.032315000 |
|                                  | 1       | -0.565268000 | -5.140735000 | -1.101074000 |
|                                  | 15      | -0.757515000 | -4.245088000 | -0.021914000 |
|                                  | 75      | 1.585427000  | 1.479532000  | 0.027194000  |
|                                  | 17      | 1.929900000  | 4.015593000  | -0.162669000 |
|                                  | 15      | 1.531263000  | 1.875468000  | -2.323473000 |
|                                  | 15      | 1.576136000  | 1.818733000  | 2.371193000  |
|                                  | 15      | 4.055261000  | 1.466443000  | -0.020538000 |
|                                  | 1       | 1.307782000  | 0.849853000  | -3.273730000 |
|                                  | 1       | 2.661280000  | 2.455976000  | -2.940459000 |
|                                  | 1       | 0.561537000  | 2.787591000  | -2.785622000 |
|                                  | 1       | 2.546867000  | 1.267869000  | 3.243642000  |
|                                  | 1       | 1.696966000  | 3.167224000  | 2.772870000  |
|                                  | 1       | 0.443247000  | 1.476449000  | 3.145252000  |
|                                  | 1       | 4.803575000  | 2.092104000  | 1.005017000  |

|  |         |              |              |              |
|--|---------|--------------|--------------|--------------|
|  | 1       | 4.750136000  | 0.237450000  | -0.028387000 |
|  | 1       | 4.735552000  | 2.078756000  | -1.100365000 |
|  | 75      | -2.073936000 | 0.633253000  | 0.027166000  |
|  | 17      | -4.442560000 | -0.336476000 | -0.161612000 |
|  | 15      | -2.390017000 | 0.386736000  | -2.323310000 |
|  | 15      | -2.363042000 | 0.457194000  | 2.371266000  |
|  | 15      | -3.298160000 | 2.778285000  | -0.022026000 |
|  | 1       | -1.389801000 | 0.704475000  | -3.273791000 |
|  | 1       | -3.457233000 | 1.075253000  | -2.941088000 |
|  | 1       | -2.696057000 | -0.909320000 | -2.784241000 |
|  | 1       | -2.371463000 | 1.574023000  | 3.242804000  |
|  | 1       | -3.591336000 | -0.112102000 | 2.773248000  |
|  | 1       | -1.500330000 | -0.352189000 | 3.146152000  |
|  | 1       | -2.581884000 | 3.994936000  | -0.032592000 |
|  | 1       | -4.170356000 | 3.059218000  | -1.100937000 |
|  | 1       | -4.212763000 | 3.114396000  | 1.004492000  |
|  | Point 1 | 0.000000000  | 0.000000000  | 0.000000000  |
|  | Point 2 | 0.000000000  | 0.000000000  | 1.000000000  |
